# Supplementary material for: Raman and XPS study on the interaction of taurine with silver nanoparticles
Source: Royal Society of Chemistry journal article supplement (doi:10.1039/c6ra09569k), 2016-01-01
Supplement: c6ra09569k1.pdf [file c6ra09569k1.pdf]

## Raman and XPS study on the interaction of taurine with silver nanoparticles

N. Maiti<sup>a\*</sup>, S. Thomas<sup>b\*</sup>, A. Debnath<sup>c</sup>, S. Kapoor<sup>a</sup>

<sup>a</sup>Radiation and Photochemistry Division, High Pressure & Synchrotron Radiation Physics Division,

<sup>c</sup>Technical Physics Division, Bhabha Atomic Research Centre, Mumbai-400085, India

### Supplementary Information

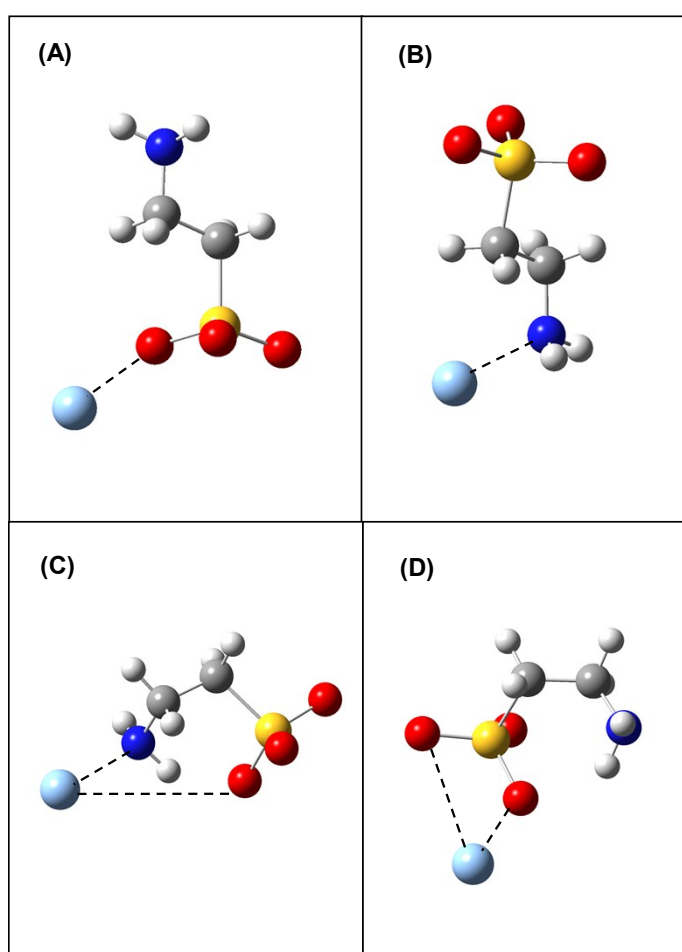

**Figure S1.** The optimized structures of neutral (A) *trans*-taurine-Ag (bound through  $\text{SO}_3^-$  group), (B) *trans*-taurine-Ag (bound through  $\text{NH}_2$  group), (C) *gauche*-taurine-Ag (bound through both  $\text{SO}_3^-$  and  $\text{NH}_2$  groups) and (D) *gauche*-taurine-Ag (bound through  $\text{SO}_3^-$  group).

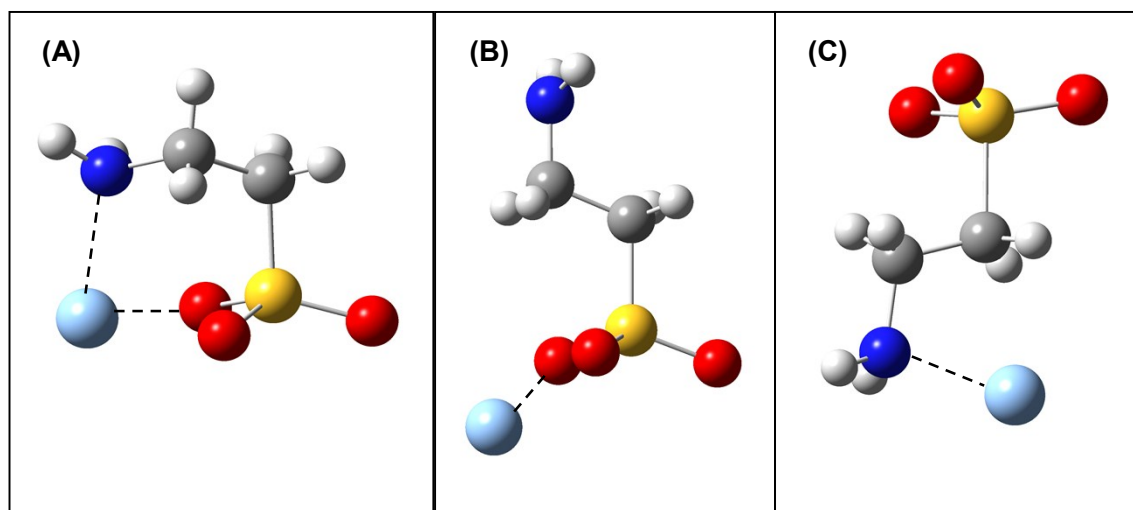

**Figure S2.** The optimized structures of charged (A) *gauche*-taurine-Ag (bound through both  $\text{SO}_3^-$  and  $\text{NH}_2$  groups), (B) *trans*-taurine-Ag (bound through  $\text{SO}_3^-$  group) and (C) *trans*-taurine-Ag (bound through  $\text{NH}_2$  group).
